# Supplementary material for: Neutral Sphingomyelinase 2 Inhibition Limits Hepatic Steatosis and Inflammation
Source: MDPI journal article supplement (doi:10.3390/cells13050463), 2024-03-06
Supplement: s1 [file s1]

Supplementary Figure S1. Quantification of ALT and AST levels in mice plasma

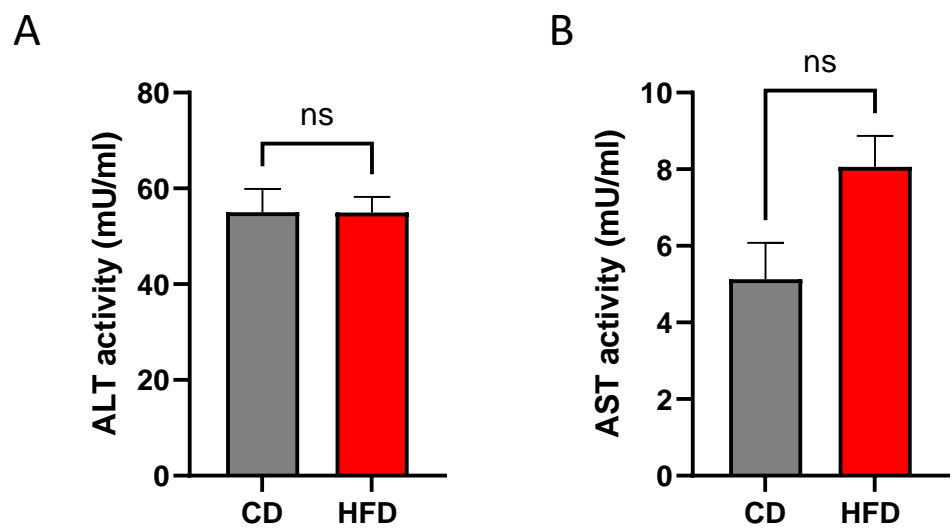

Supplementary Figure S1. Quantification of ALT and AST levels in plasma of mice fed with a diet-induced steatosis. The plasma levels of ALT were measured using the Alanine Transaminase Activity Assay Kit (Abcam, ab-105134), according to the manufacturer’s instructions. The plasma levels of AST were measured using the Aspartate Aminotransferase Activity Assay Kit (Abcam, ab-105135), according to the manufacturer’s instructions.

**(A)** ALT activity **(B)** AST activity Results were obtained from a minimum of n=5. All data are expressed as mean ± SEM .

Supplementary Figure S2 . Increase of nSMase gene expression livers of mice fed with a diet-induced steatosis

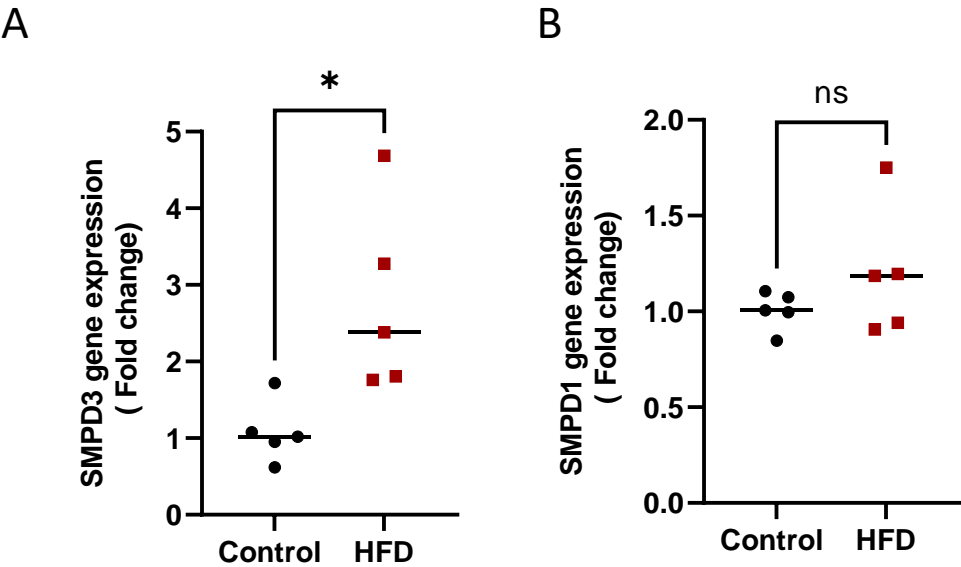

Supplementary Figure S2. Increase of nSMase gene expression livers of mice fed with a diet-induced steatosis. **(A)** qRT-PCR analysis of SMPD3 gene expression. **(B)** qRT-PCR analysis of SMPD1 gene expression. Results were obtained from a minimum of n=5. All data are expressed as mean  $\pm$  SEM . \*  $p \leq 0.5$ , \*\*  $p \leq 0.1$  \*\*\*  $p \leq 0.001$ , \*\*\*\*  $p \leq 0.0001$  and ns: non-significant. Images are shown at 20 magnification; Scale bar = 50 m.

Supplementary Figure S3. Inducing hepatic steatosis with high glucose and high oleate acid culture in HepG2

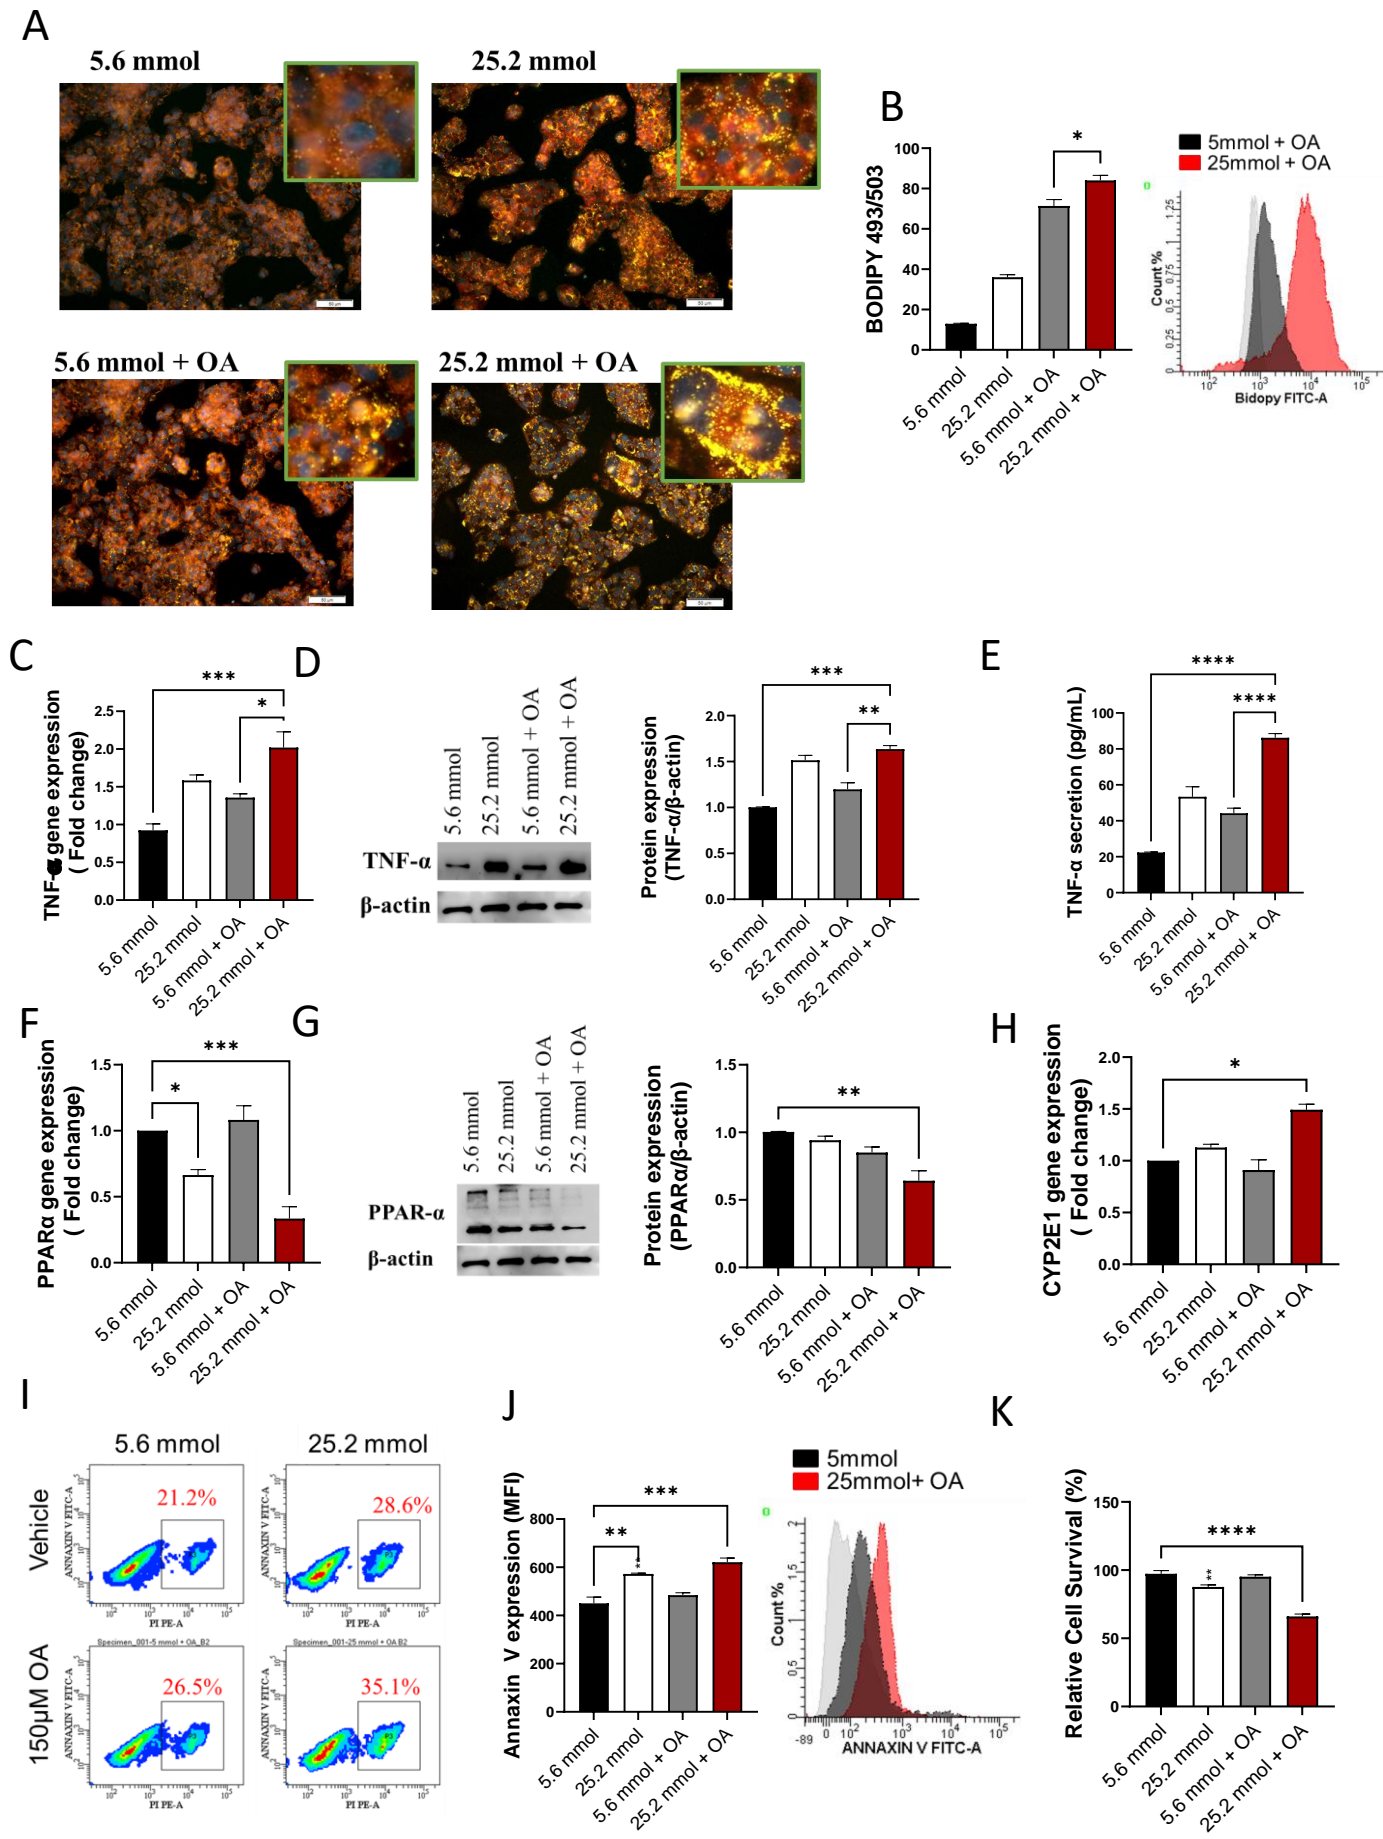

**Figure S3. Inducing hepatic steatosis with high glucose and high oleate acid culture in HepG2.** HepG2 cells were cultured in either low (5.6 mmol) D-glucose or high (25.2 mmol) D-glucose in the presence or absence of OA stimulation. (A) Nile red fluorescence staining; (B) Bar graph of median fluorescence intensity (MFI) of BODIPY 493/503 calculated from three independent determinations, with similar results presented in the histogram; (C) qRT-PCR analysis of TNF- $\alpha$  expression; (D) TNF- $\alpha$  protein analysis with representative immunoblot; (E) TNF- $\alpha$  protein secretion in the media measured by enzyme-linked immunosorbent assay; (F) qRT-PCR analysis of PPAR $\alpha$  expression; (G) PPAR $\alpha$  protein analysis with representative immunoblot; (H) qRT-PCR gene expression analysis of Cyp2E1 expression; (I) Representative flow cytometry plots using Annexin V-FITC/PI staining for apoptosis; (J) Bar graph of MFI of Annexin V-FITC calculated from three independent determinations, with similar results presented in the histogram; (K) Bar graph of viable cells percentage analyzed using an MTT assay. Results were obtained from a minimum of three independent experiments. All data are expressed as mean  $\pm$  SEM. \*  $p \leq 0.05$ , \*\*  $p \leq 0.01$  \*\*\*  $p \leq 0.001$ , \*\*\*\*  $p \leq 0.0001$  and ns: non-significant. Images are shown in 20x magnifications: Scale bar = 50  $\mu$ m.

# Supplementary Figure S4: Effect of nSMase inhibition in HepG2 liver steatosis model

A

■ Vehicle + OA  
■ GW4869 + OA

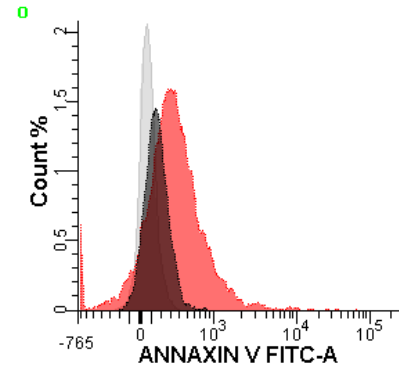

B

■ Vehicle + OA  
■ Imip + OA

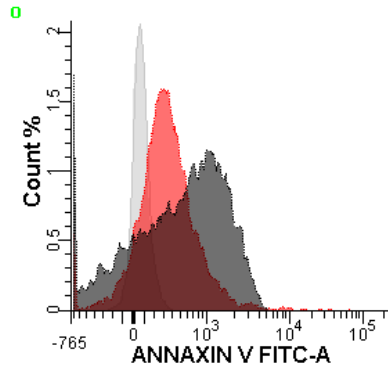

C

■ Vehicle + OA  
■ DNR + OA

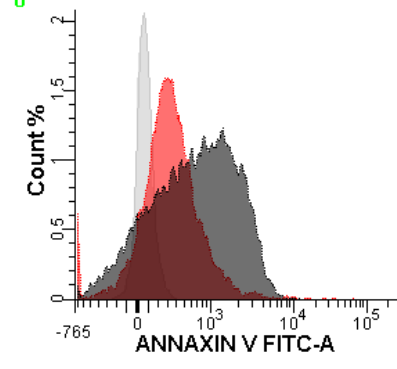

**Figure S4.** Effect of nSMase inhibition in HepG2 liver steatosis model . Represented histograms of fluorescence intensity (MFI) of BODIPY 493/503 in **(A)** Under GW4869 inhibition . **(B)** Under Imip inhibition and **(C)** Under DNR inhibition .
